# Supplementary figures and images for: The NADase-Negative Variant of the Streptococcus pyogenes Toxin NAD+ Glycohydrolase Induces JNK1-Mediated Programmed Cellular Necrosis
Source: PubMed Central journal article supplement — mBio. 2016 Feb 2;7(1):e02215-15. doi: 10.1128/mBio.02215-15 (PMC4742715; doi:10.1128/mbio.02215-15), 2016-02-02

Figure S1

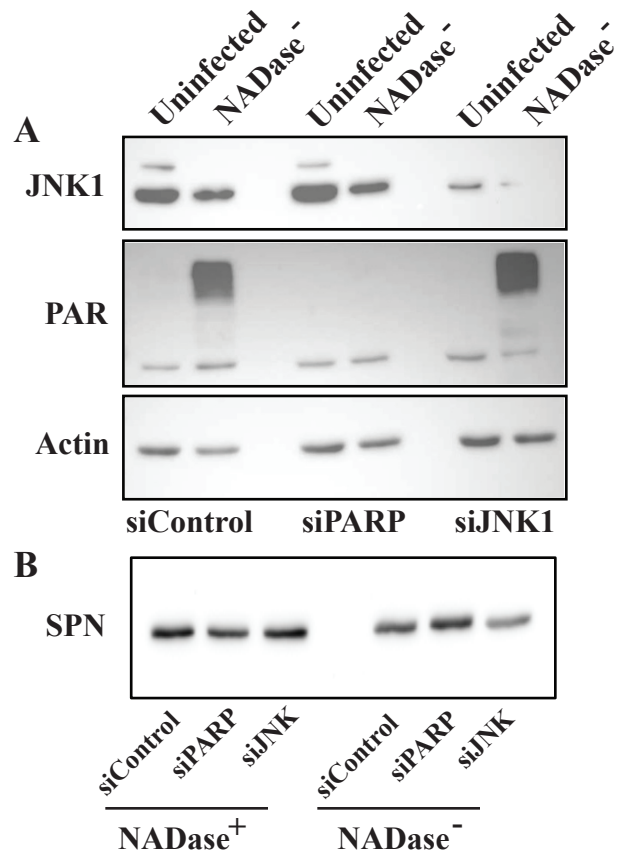

Supplement: mbo001162660sf1.pdf [file mbo001162660sf1.pdf]
